# Supplementary material for: Cooperative Binding of KaiB to the KaiC Hexamer Ensures Accurate Circadian Clock Oscillation in Cyanobacteria
Source: PubMed Central journal article supplement (PMC6769508; doi:10.3390/ijms20184550), 2019-09-13
Supplement: ijms-20-04550-s001.pdf [file ijms-20-04550-s001.pdf]

# Supplemental Information:

## Cooperative Binding of KaiB to the KaiC Hexamer Ensures Accurate Circadian Clock Oscillation in Cyanobacteria

Reiko Murakami <sup>1,†,‡</sup>, Yasuhiro Yunoki <sup>1,2,‡</sup>, Kentaro Ishii <sup>1,2,3</sup>, Kazuki Terauchi <sup>4</sup>,  
Susumu Uchiyama <sup>3,5</sup>, Hirokazu Yagi <sup>1</sup> and Koichi Kato <sup>1,2,3,\*</sup>

- <sup>1</sup> Graduate School of Pharmaceutical Sciences, Nagoya City University, 3-1 Tanabe-dori, Mizuho-ku, Nagoya 467-8603, Japan; taniyama@fujita-hu.ac.jp (R.M.); c182803@ed.nagoya-cu.ac.jp (Y.Y.); kishii@bio.eng.osaka-u.ac.jp (K.I.); hyagi@phar.nagoya-cu.ac.jp (H.Y.)
  - <sup>2</sup> Institute for Molecular Science, National Institutes of Natural Sciences, 5-1 Higashiyama, Myodaiji-cho, Okazaki 444-8787, Japan
  - <sup>3</sup> Department of Creative Research, Exploratory Research Center on Life and Living Systems (ExCELLS), National Institutes of Natural Sciences, 5-1 Higashiyama, Myodaiji-cho, Okazaki 444-8787, Japan; suchi@bio.eng.osaka-u.ac.jp
  - <sup>4</sup> Graduate School of Life Sciences, Ritsumeikan University, 1-1-1 Noji-higashi, Kusatsu, Shiga 525-8577, Japan; terauchi@fc.ritsumei.ac.jp
  - <sup>5</sup> Department of Biotechnology, Graduate School of Engineering, Osaka University, 2-1 Yamadaoka, Suita, Osaka 565-0871, Japan
- \* Correspondence: kkato@excells.orion.ac.jp; Tel.: +81-564-59-5225; Fax: +81-564-59-5224
- † Present address: Research Promotion and support headquarters, Fujita Health University Graduate School of Health Sciences, Toyoake, Aichi 470-1192, Japan
- ‡ These two authors contributed equally to this work.

### Supplemental Figures 1, 2, 3, 4, 5, 6, 7, and 8

```

                23 26
Thermosynechococcus elongatus BP-1 MAPLRKTYVLKLYVAGNTFNSVRALKTLNILEKEFKGVYALKVIDVLKNPQLAEEKIL 60
Synechococcus sp. PCC 7942 MSP-RKTYILKLYVAGNTFNSVRALKTLKNILEVEFQGVYALKVIDVLKNPQLAEEKIL 59
Cyanothece sp. PCC 7425 MSPLKTTYVLKLYVAGNTFNSVRALKTLNILEQEFQGVYALKVIDVLKNPQLAEEKIL 60
Microcystis aeruginosa MSVFKKTYVLKLYVAGNTFNSVRALKTLKNILEEEFQGVYALKVIDVLKNPQLAEEKIL 60
Synechocystis sp. PCC 6803 MSPFFKTYVLKLYVAGNTFNSVRALKMLKNILEQEFQGVYALKVIDVLKNPQLAEEKIL 60
Trichodesmium erythraeum IMS101 MSPLKTTYVLKLYVAGNTFNSVRALKTLKEILEQEFQGVYALKVIDVLKNPQLAEEKIL 60
Acaroyochloris marina MBIC11017 MSSIRKTYVLKLYVAGNTFNSVRALKTLNHILETEFQGVYALKVIDVLKNPQLAEEKIL 60
Cyanothece sp. PCC 8801 MVNFKKTYVLKLYVAGNTFNSVRALKTLNILEDEFKGVYALKVIDVLKNPQLAEEKIL 60
Cyanothece sp. PCC 7424 MNTFRKTYVLKLYVAGNTFNSVRALKTLKTILEQEFQGVYALKVIDVLKNPQLAEEKIL 60
Synechococcus sp. WH 8102 -MSPRKTYILKLYVAGNTFNSMRALKTLRNILETEFRGVYALKVIDVLKNPQLAEEKIL 59
Synechococcus sp. WH 7803 -MSPRKTYILKLYVAGNTFNSMRALKTLRNILETEFKGVYALKVIDVLKNPQLAEEKIL 59
Synechococcus sp. PCC 7002 MNLLKTTYVLKLYVAGNTFNSVRALKTLKNILETDFKGVYALKVIDVLKNPQLAEEKIL 60
Nostoc sp. PCC 7120 MNKARKTYVLKLYVAGNTFNSVRALKTLKNILEQEFQGIYALKVIDVLKNPQLAEEKIL 60
Anabaena variabilis ATCC 29413 MNKARKTYVLKLYVAGNTFNSVRALKTLKNILEQEFQGIYALKVIDVLKNPQLAEEKIL 60
Synechococcus sp. CC9311 -MSPRKTYILKLYVAGNTFNSMRALKTLRNILETEFKGVYALKVIDVLKNPQLAEEKIL 59
                :*:*****:***: *  ** :*:*****:*****
                84 91
Thermosynechococcus elongatus BP-1 ATPTLAKVLPPEVRRRIIGDLSNREKVLIGLDLLYEEIGDQAEEDD-LGLE----- 108
Synechococcus sp. PCC 7942 ATPTLAKVLPPEVRRRIIGDLSDREKVLIGLDLLYEGEL--QDSDDF----- 102
Cyanothece sp. PCC 7425 ATPTLAKILPPEVRRKIIGDLSDREKVLIGLDLLYEEFAEAEEAE----- 105
Microcystis aeruginosa ATPTLAKVLPPEVRRKIIGDLSDREKVLIGLDLLYEEIRERENDS----- 104
Synechocystis sp. PCC 6803 ATPTLAKILPPEVRRKIIGDLSDREKVLIGLDLLYDEIREREAEDQ----- 105
Trichodesmium erythraeum IMS101 ATPTLSKILPPEVRRKIIGDLSDREKVLIGLDLLYEEELNEDEYNL----- 104
Acaroyochloris marina MBIC11017 ATPTLAKVLPPEVRRKIIGDLSDREKVLIGLDLLYEEELSDGIMEY----- 104
Cyanothece sp. PCC 8801 ATPTLSKILPPEVRRKIIGDLSDREKVLIGLDLLYEEIRERESSEL----- 104
Cyanothece sp. PCC 7424 ATPTLAKVLPPEVRRKIIGDLSDREKVLIGLDLLYDEIQDRESELDF----- 106
Synechococcus sp. WH 8102 ATPTLSKILPPEVRRRIIGDLSDREKVLIGLDLLYDELADNAFSSG----- 104
Synechococcus sp. WH 7803 ATPTLSKILPPEVRRKIIGDLSDREKVLIGLDLLYDELADNLSLSTLMDALEDADTTDSDS 119
Synechococcus sp. PCC 7002 ATPTLSKILPPEVRRKIIGDLSDREKVLIGLDLLYEEFLEREEL----- 104
Nostoc sp. PCC 7120 ATPTLSKILPPEVRRKIIGDLSDREKVLIGLDLLYEEELTEEDWEAQSNL----- 108
Anabaena variabilis ATCC 29413 ATPTLSKILPPEVRRKIIGDLSDREKVLIGLDLLYEEELTEEDWEAQSSL----- 108
Synechococcus sp. CC9311 ATPTLSKILPPEVRRRIIGDLSDREKVLIGLDLLYDELVDNLDLNSLMDALGVPDIEEADS 119
                *****:*****:*****:*****:*****:*****:

```

**Figure S1. Sequence alignment of KaiB from different species.** Sequences were aligned using Clustal W. The residues involved in the KaiB–KaiB lateral interactions are highlighted in cyan (protomer 1) and pink (protomer 2).

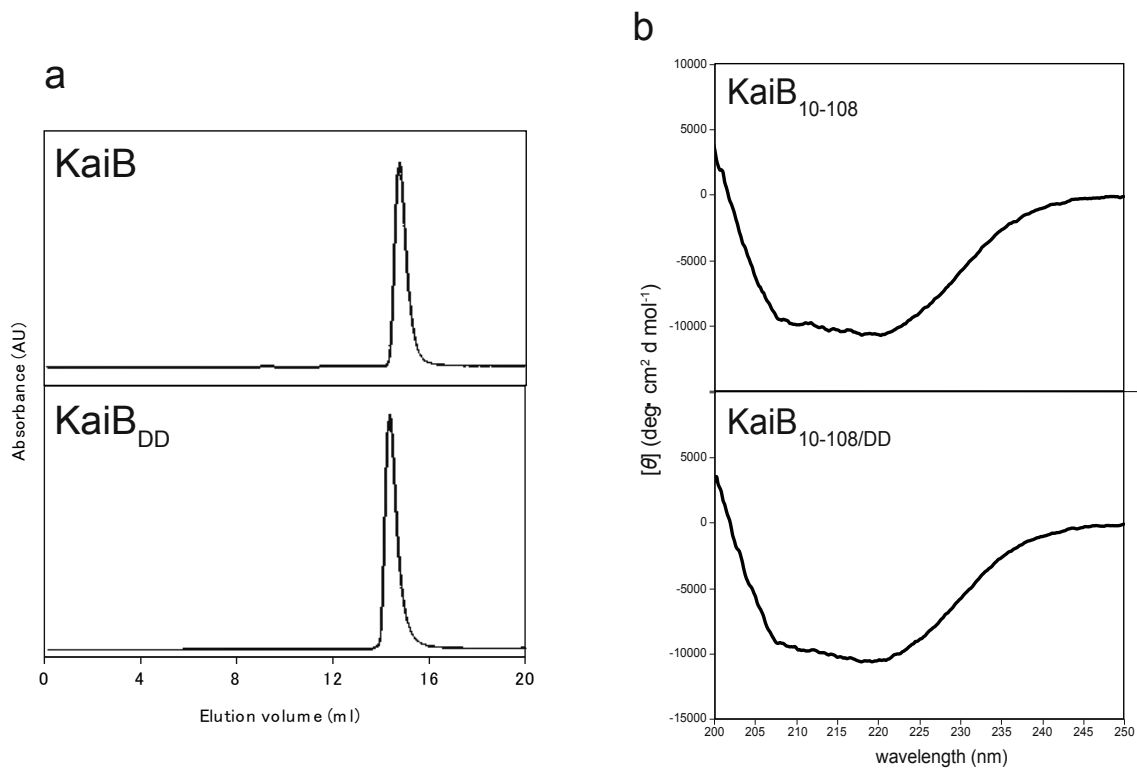

**Figure S2.** Comparative structural characterization between TeKaiB and TeKaiB<sub>DD</sub> by size exclusion chromatography and circular dichroism spectroscopy. (a) Elution profiles of TeKaiB and TeKaiB<sub>DD</sub>. (b) Circular dichroism spectra of TeKaiB<sub>10-108</sub> and TeKaiB<sub>10-108/DD</sub>.

**a**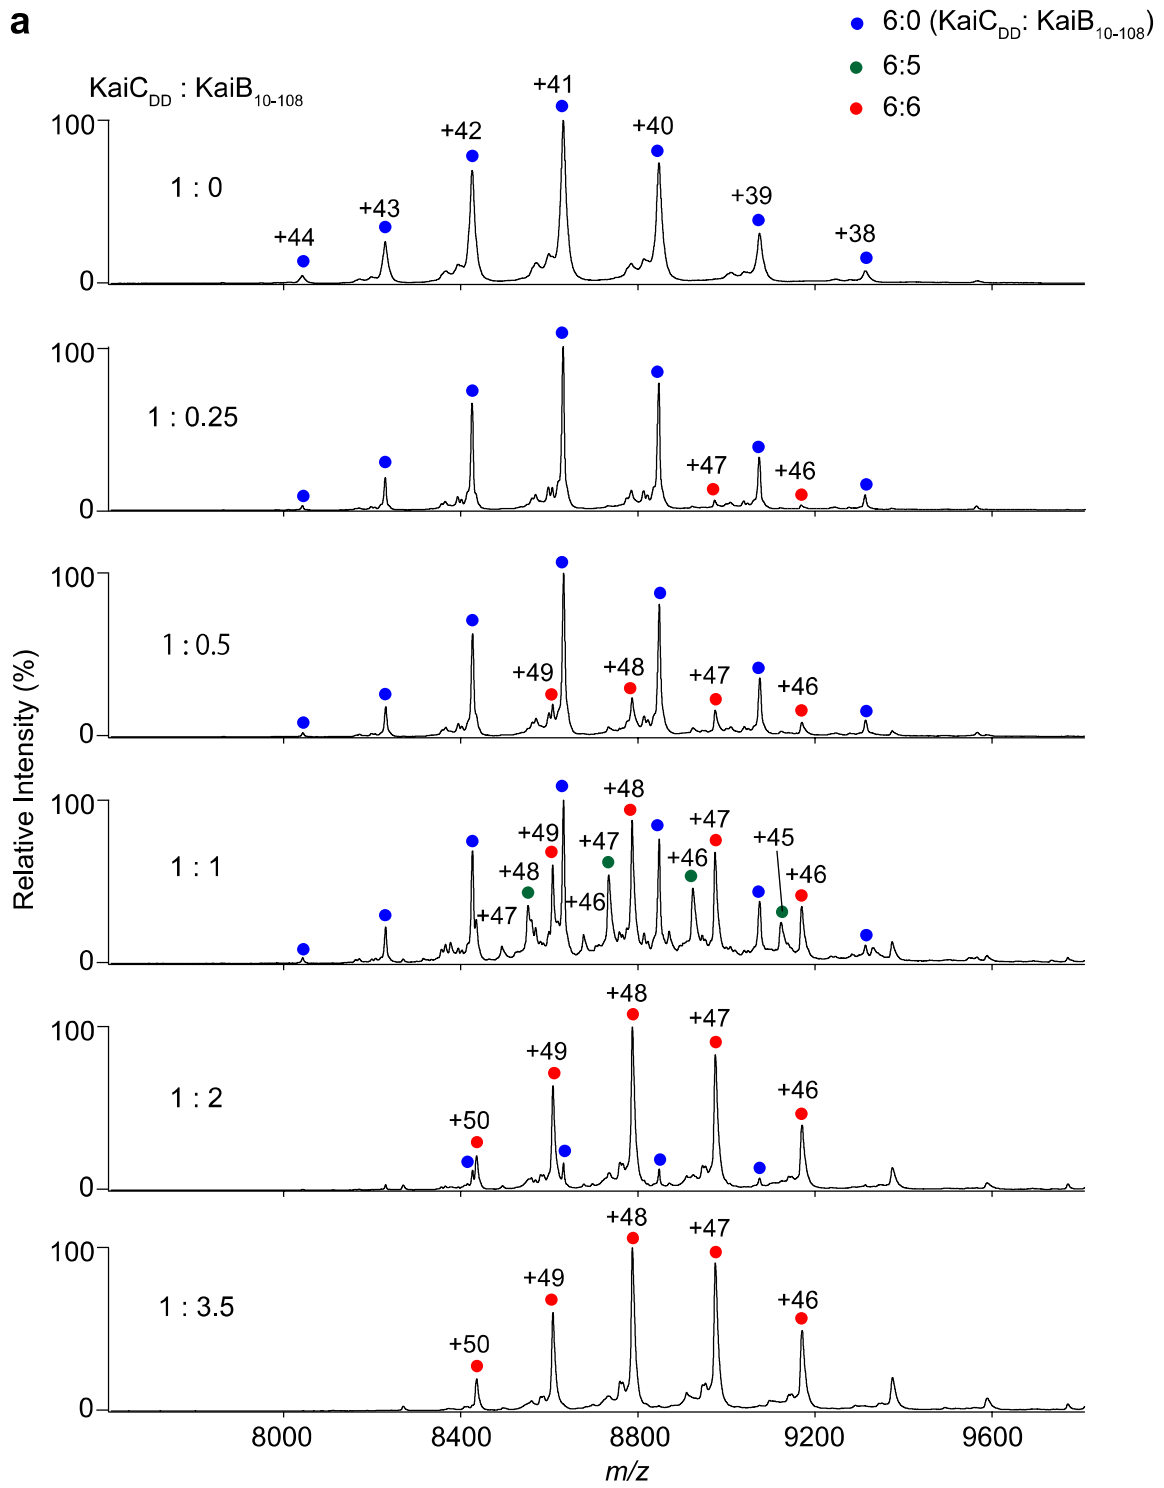

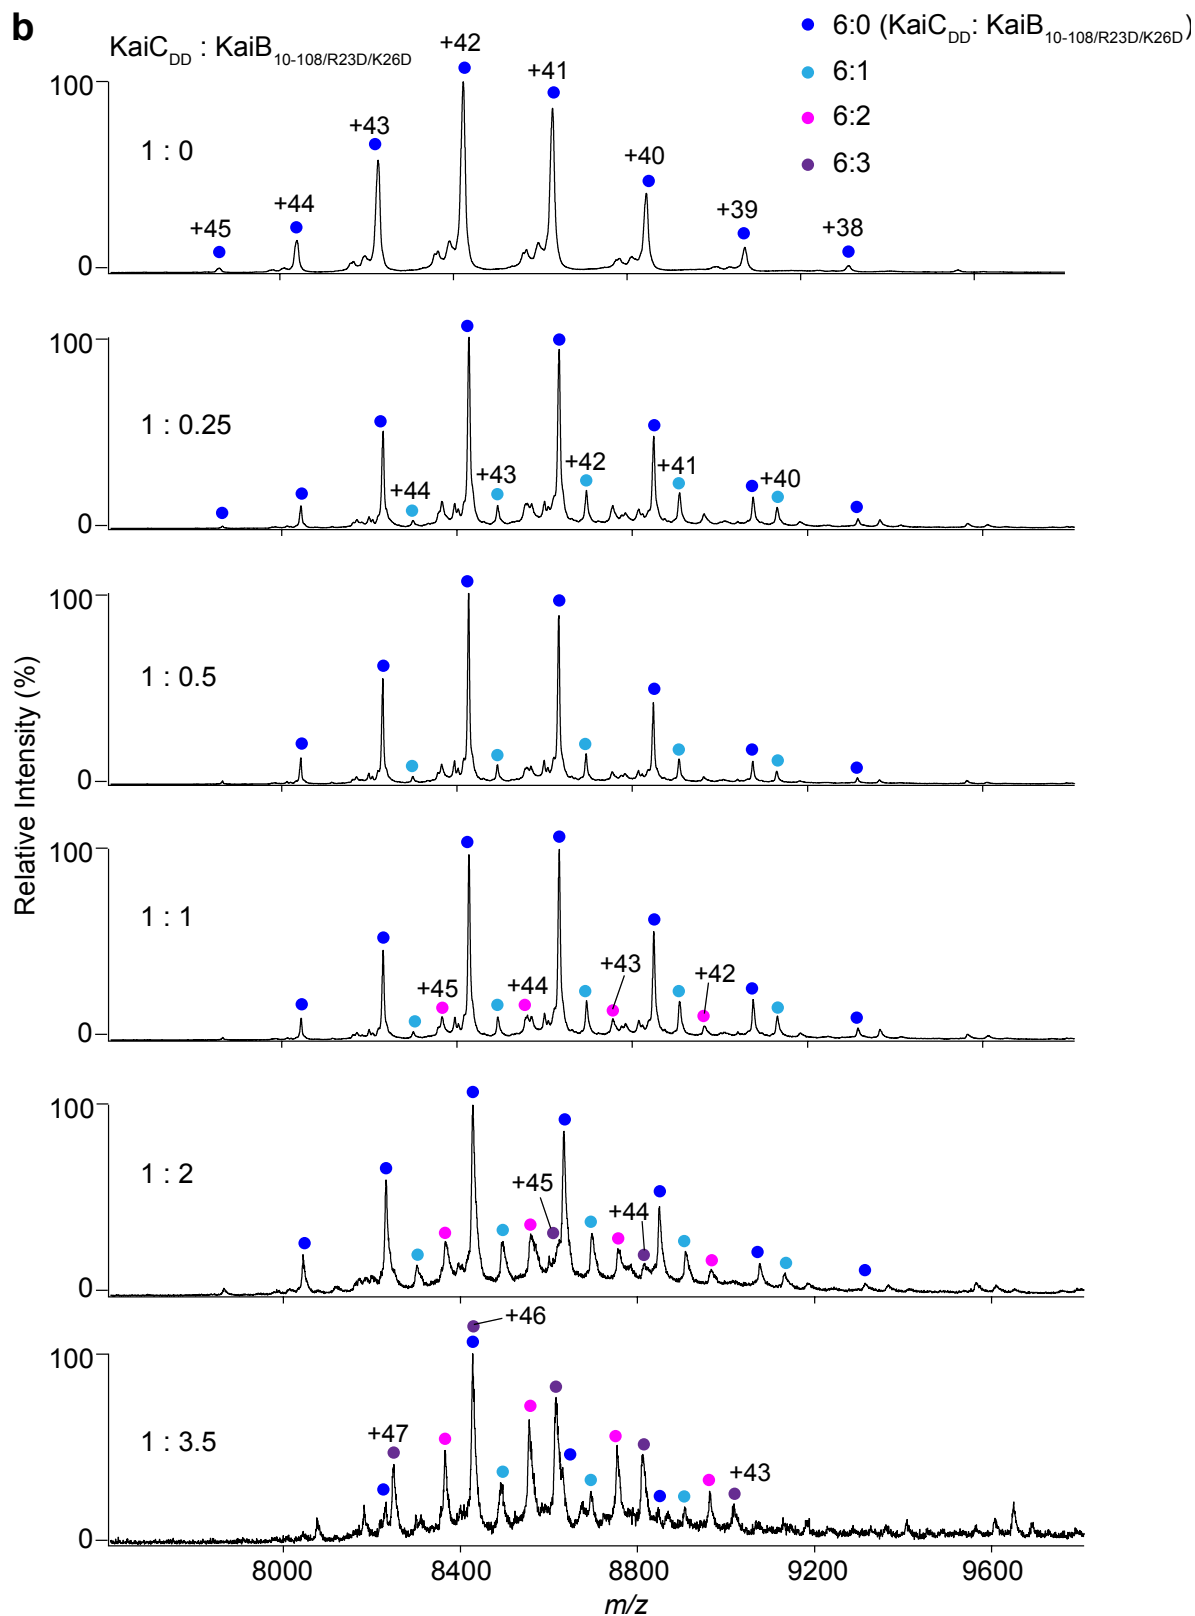

**Figure S3. Native MS analysis of KaiB–KaiC complex formation.** Mass spectra of mixtures of TeKaiC<sub>DD</sub> and (a) TeKaiB<sub>10-108</sub> or (b) TeKaiB<sub>10-108/DD</sub> at 1:0, 1:0.25, 1:0.5, 1:1, 1:2, and 1:3.5 molar ratios (TeKaiC<sub>DD</sub> to TeKaiB). The blue, cyan, magenta, purple, green and red circles show the ion series of the TeKaiC<sub>DD</sub> homohexamer and 6:1, 6:2, 6:3, 6:5 and 6:6 complexes of TeKaiC<sub>DD</sub> and the TeKaiB mutants, respectively.

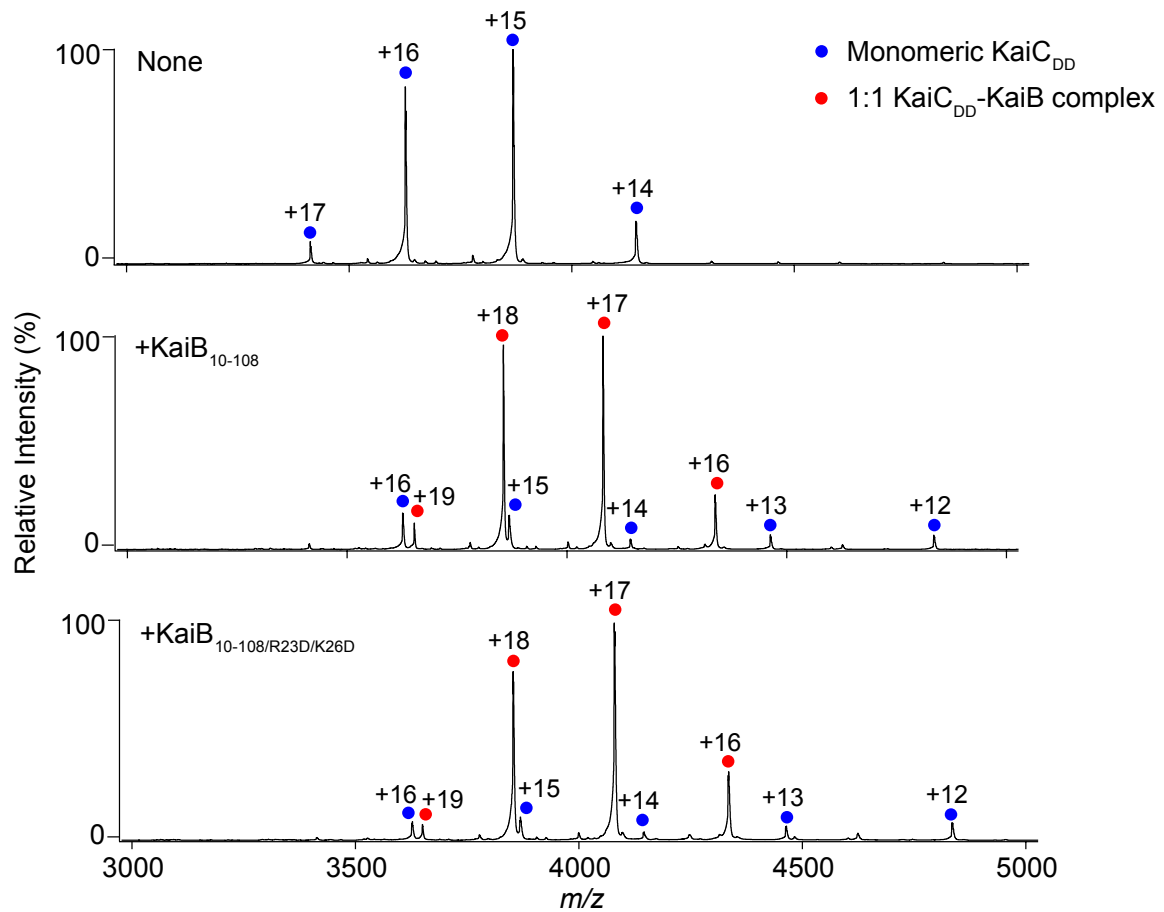

**Figure S4. Native MS analysis of complex formation between the TeKaiB mutants and the TeKaiC<sub>DD</sub> monomer.** Kai<sub>DD</sub> monomer was monomeric in the absence of ATP conditions. Mass spectra of mixtures of the monomeric TeKaiC<sub>DD</sub> with TeKaiB<sub>10-108</sub> or TeKaiB<sub>10-108/DD</sub> at a 1:2 molar ratio (TeKaiC<sub>DD</sub> to TeKaiB). The blue and red circles show the ion series of the TeKaiC<sub>DD</sub> homo-hexamer and the 1:1 complex of TeKaiC<sub>DD</sub> and TeKaiB, respectively.

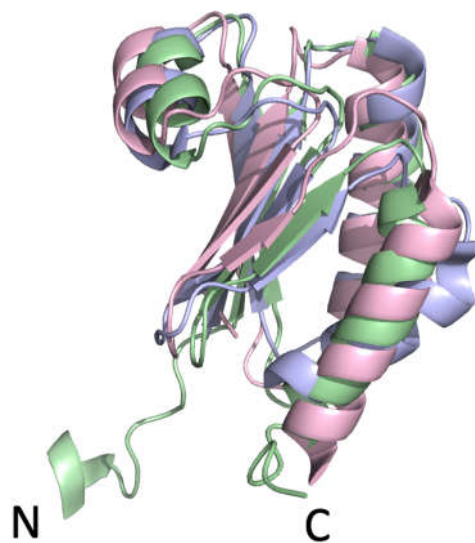

**Figure S5. Structural alignment of the KaiB and SasA proteins.** Superposition of SySasA<sub>N</sub> (PDB code: 1T4Y, shown in pale green), SyKaiB in the KaiC–KaiB complex (PDB code: 5N8Y, light pink), and TeKaiB in the KaiC–KaiB complex (PDB code: 5JWO, pale blue).

(a)

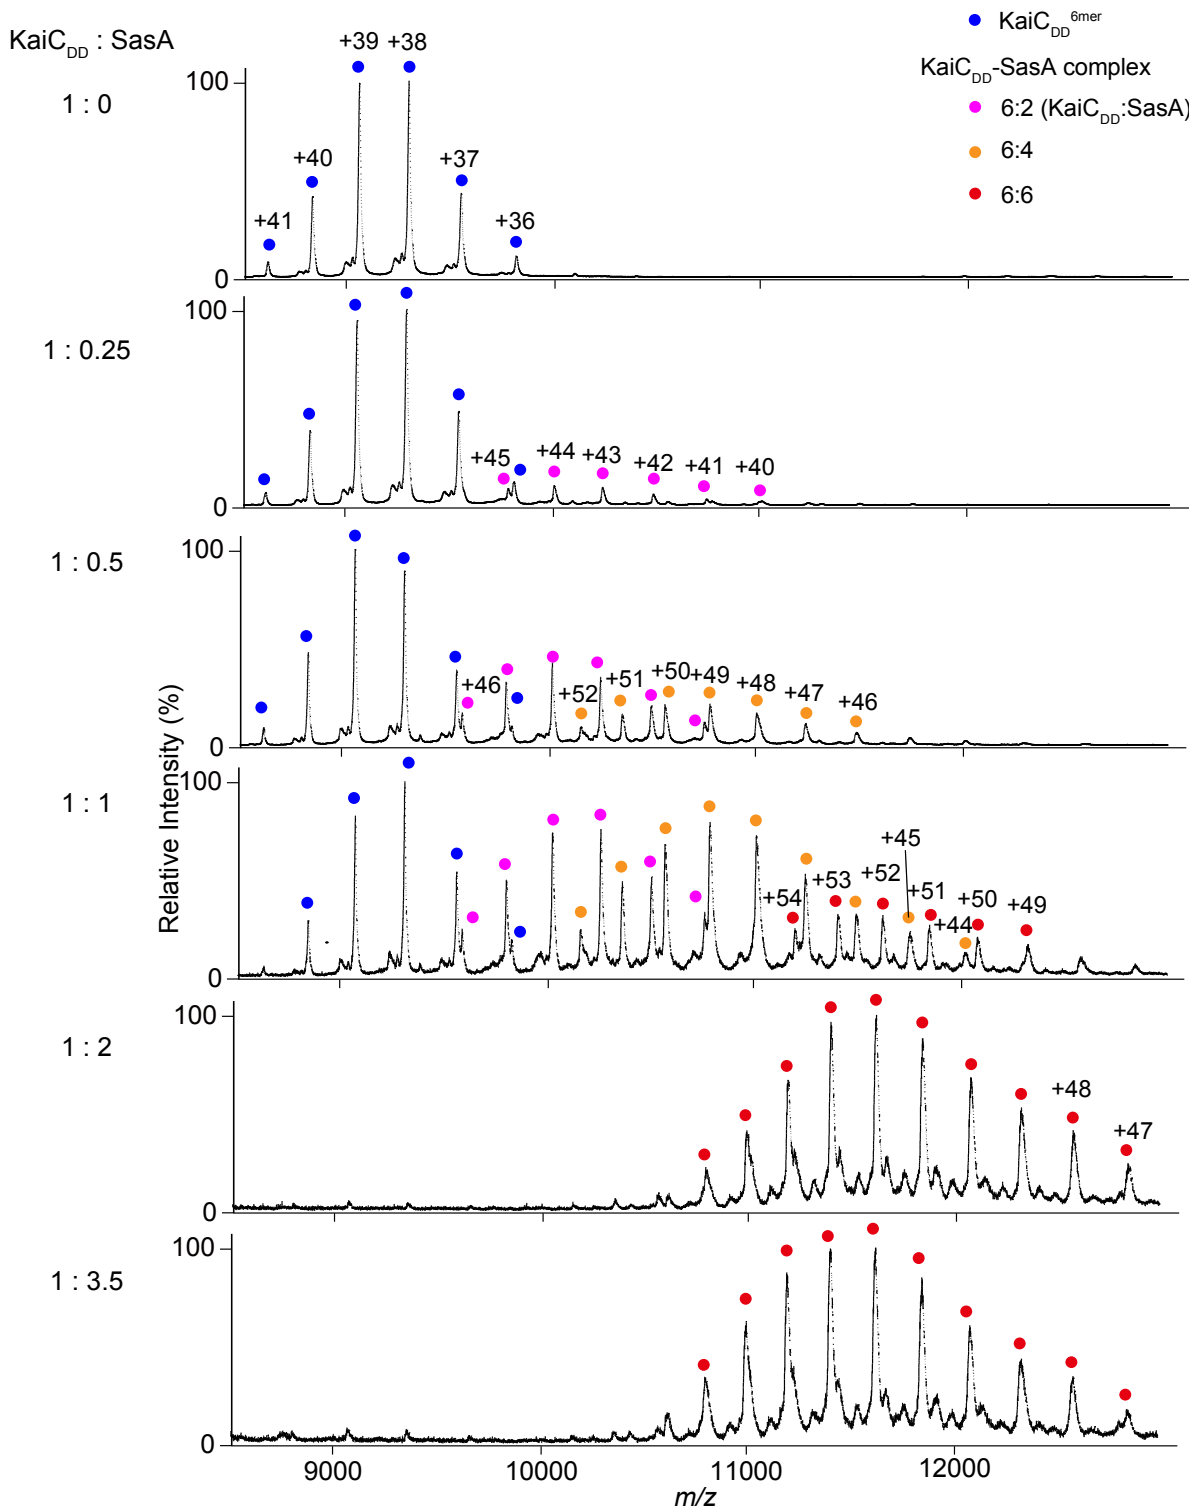

(b)

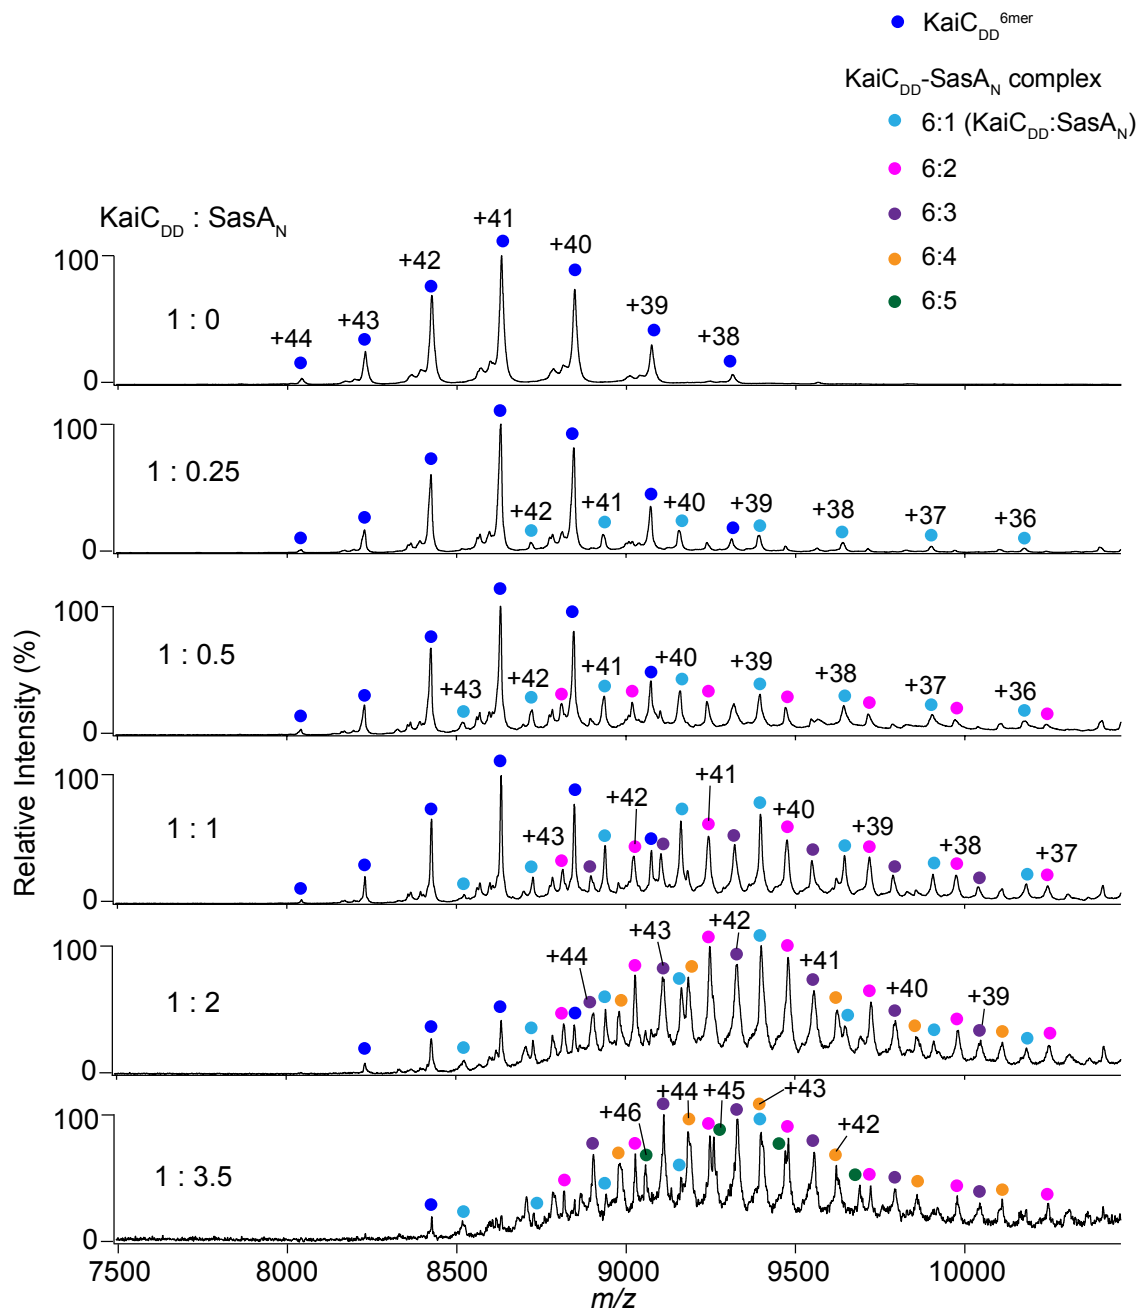

**Figure S6. Native MS analysis of SasA-KaiC complex formation.** Mass spectra of mixtures of  $\text{TeKaiC}_{\text{DD}}$  with (a) full length  $\text{TeSasA}$  and (b)  $\text{TeSasA}_\text{N}$  at 1:0, 1:0.25, 1:0.5, 1:1, 1:2, and 1:3.5 molar ratios ( $\text{TeKaiC}_{\text{DD}}$  to  $\text{TeSasA}$ ). The blue, cyan, magenta, purple, orange, and green circles show the ion series of the  $\text{TeKaiC}_{\text{DD}}$  homo-hexamers and the 6:1, 6:2, 6:3, 6:4 and 6:5 complexes of  $\text{TeKaiC}_{\text{DD}}$  and  $\text{TeSasA}$ , respectively.

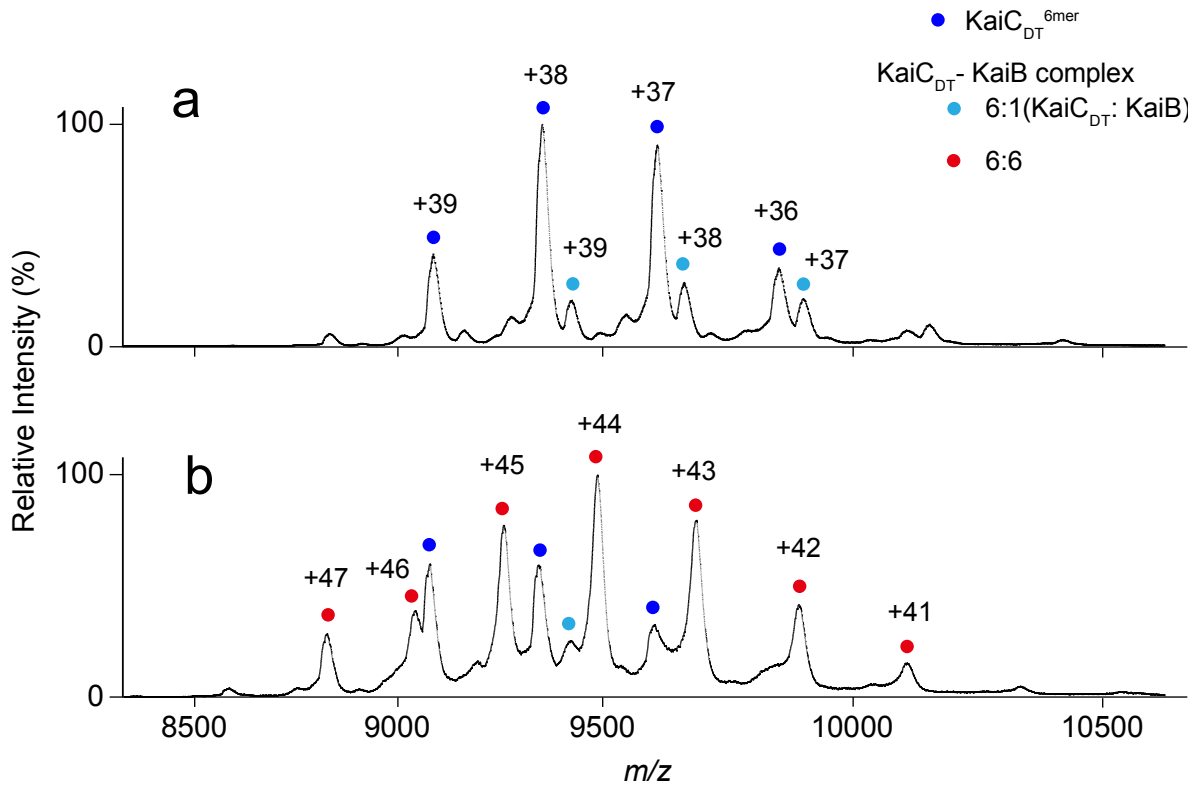

**Figure S7. Native MS analysis of synechococcal KaiB–KaiC complex formation.** Mass spectra of mixtures of SyKaiC<sub>DT</sub> with (a) SyKaiB<sub>DD</sub> or (b) SyKaiB at 2:3 molar ratio (SyKaiC<sub>DT</sub> to SyKaiB). The blue, cyan, and red circles show the ion series of the TeKaiC<sub>DD</sub> homohexamer and 6:1 and 6:6 complexes of SyKaiC<sub>DT</sub> and the SyKaiB mutants, respectively.

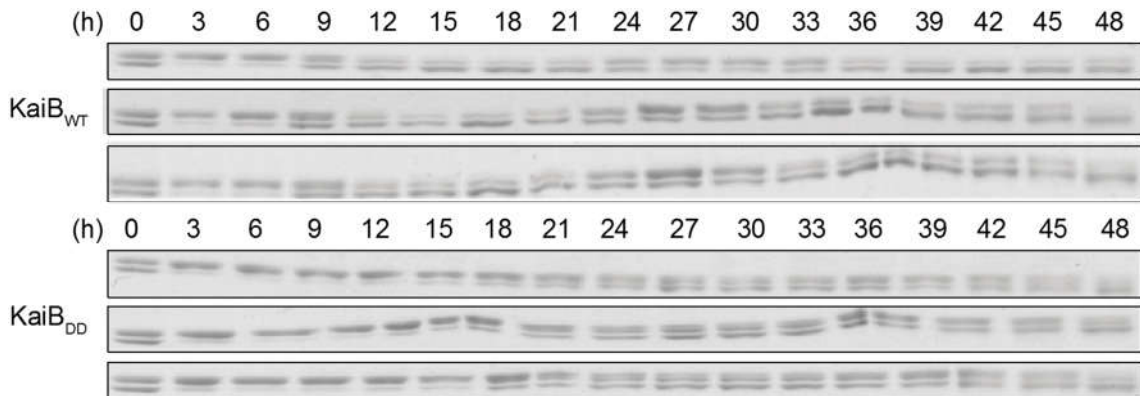

**Figure S8. Circadian oscillations *in vitro*.** Phosphorylated KaiC levels in the presence of wild-type SyKaiB and its mutant SyKaiB<sub>DD</sub>. SDS-PAGE of reaction mixtures containing SyKaiA, SyKaiC, wild-type KaiB, or KaiB mutant on 7.5% gels stained with Coomassie brilliant blue. The mixtures were incubated at 30°C for 48 h; aliquots were removed every 3 h and the reactions were quenched. The upper and lower bands correspond to phosphorylated and unphosphorylated KaiC, respectively. The data were presented in triplicate.
